# Supplementary material for: Gasdermin-D-dependent IL-1α release from microglia promotes protective immunity during chronic Toxoplasma gondii infection
Source: PubMed Central journal article supplement (PMC7378823; doi:10.1038/s41467-020-17491-z), 2020-07-23
Supplement: 41467_2020_17491_MOESM1_ESM.pdf [file 41467_2020_17491_MOESM1_ESM.pdf]

**Gasdermin-D-dependent IL-1 $\alpha$  release from microglia promotes protective immunity**

**during chronic *Toxoplasma gondii* infection**

Batista et al.

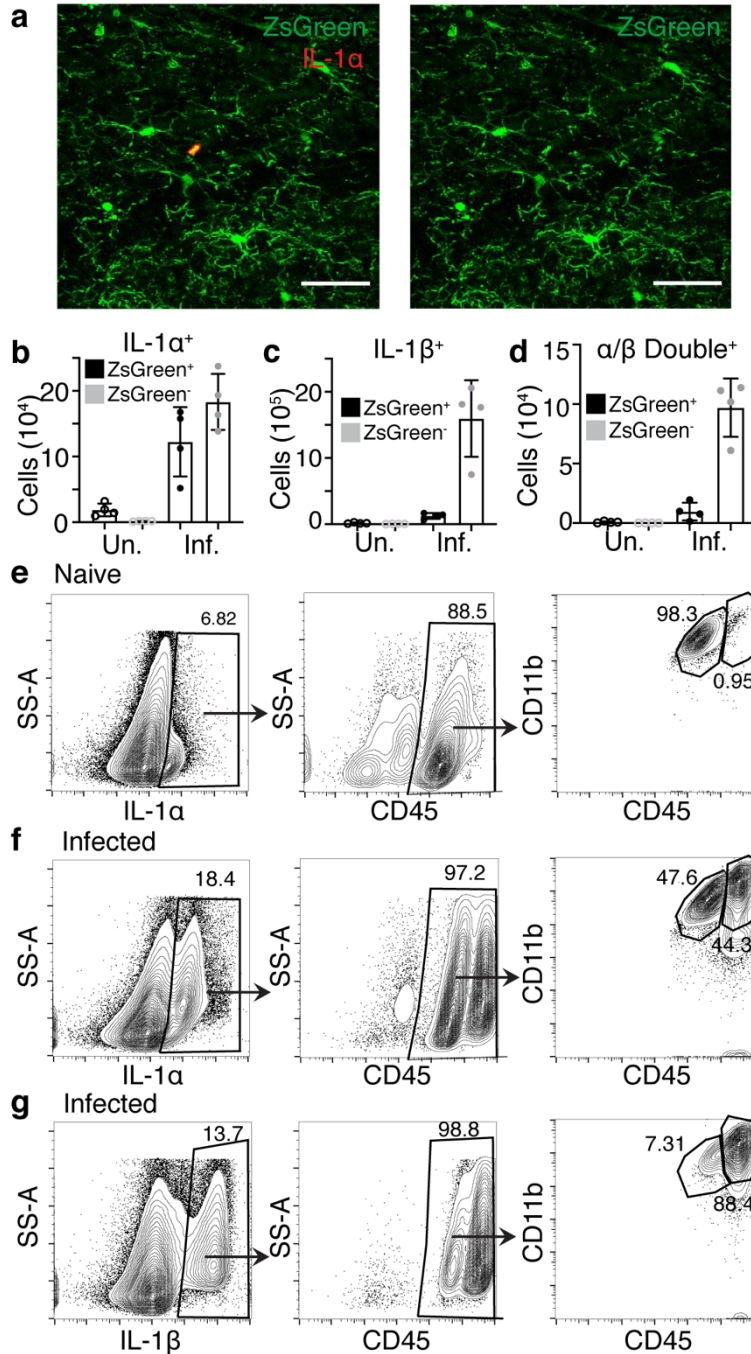

**Supplementary Figure 1 | Microglia and macrophages in the infected brain differ in IL-1 expression.** **a-d**,  $CX_3CR_1^{Cre-ERT2} \times ZsGreen^{fl/stop/fl}$  mice were left naïve or infected with 10 cysts of Me49 strain *T. gondii* parasites for 4 weeks. (n = 4 mice per group) **a**, Representative image of IL-1 $\alpha$  in naïve brain colocalizing with microglia, scale bar is 50  $\mu$ m. **b-d**, Brains were harvested and analyzed by flow cytometry with intracellular cytokine staining. Data are presented as mean values  $\pm$  SEM. Numbers of IL-1 $\alpha$ <sup>+</sup> (**b**), IL-1 $\beta$ <sup>+</sup> (**c**), and double positive (**d**) cells were quantified in both ZsGreen<sup>+</sup> and ZsGreen<sup>-</sup> populations in naïve and infected mice. Cells were pre-gated on singlets/live/ZsGreen. **e-g**, Brains from naïve or chronically infected mice were analyzed by flow cytometry. **e**, Representative plots of IL-1 $\alpha$  expression for naïve samples, previously gated on live/singlets. **f-g**, Representative plots of IL-1 $\alpha$  (**f**) and IL-1 $\beta$  (**g**) expression for infected samples.

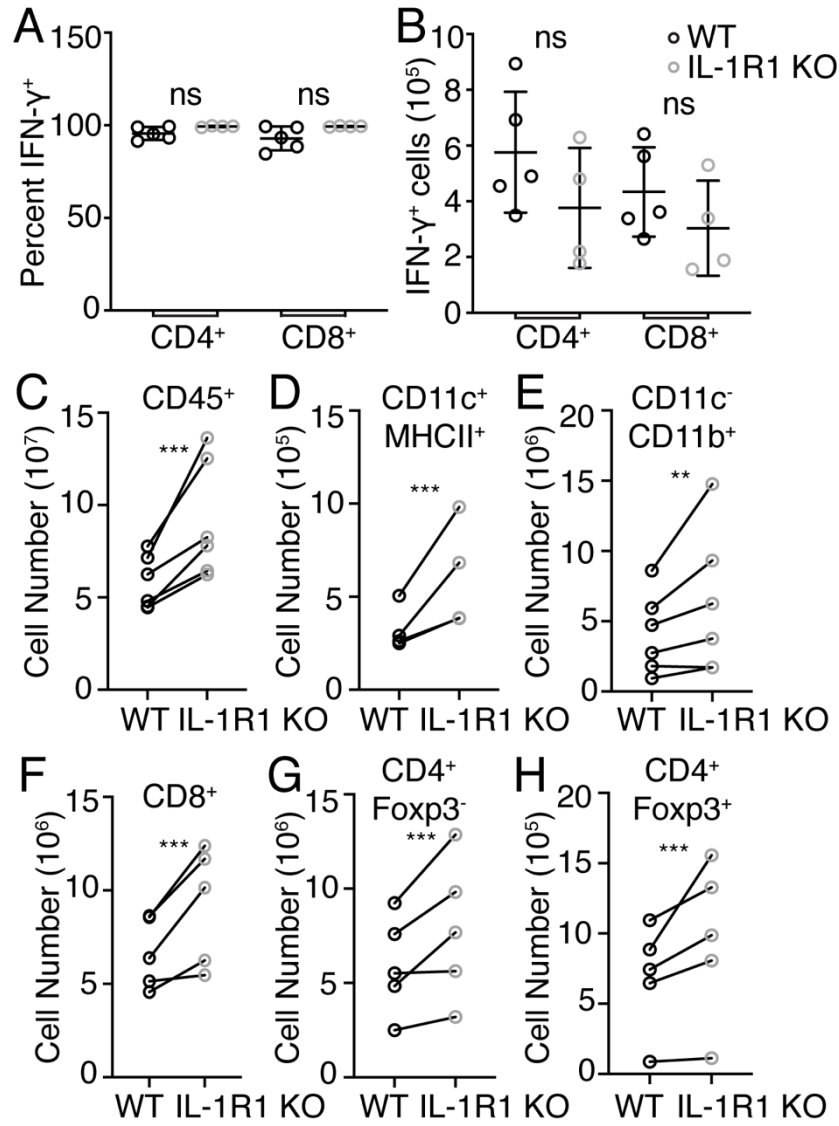

**Supplementary Figure 2 | Brain IFN- $\gamma$  responses and peripheral immune responses are not impaired in IL-1R1 KO mice during chronic *T. gondii* infection.** WT and IL-1R1 KO mice were infected i.p. with 10 cysts of the Me49 strain of *T. gondii*. 6 weeks p.i. brains (**a-b**) and spleens (**c-h**) were harvested and processed for flow cytometry. Immune cell populations were enumerated. **a-b**, Brains were harvested and digested. Isolated cells were incubated at 37°C for 5 hours with a mix of PMA/ionomycin and brefeldin A. Intracellular cytokine staining was performed and analyzed by flow cytometry. Cells were pre-gated on singlets/Live/CD3<sup>+</sup> and percent (**a**) and number (**b**) of IFN- $\gamma^+$  CD4 and CD8<sup>+</sup> T cells were determined. **c**, Total immune cells, pre-gated on singlets/live,  $p = 2.64 \times 10^{-6}$  **d**, DCs, pre-gated on singlets/live/CD45<sup>+</sup>/Dump(CD3/NK1.1/B220),  $p = 6.19 \times 10^{-4}$  **e**, Monocytes/ macrophages, pre-gated on singlets/live/ CD45<sup>+</sup>/CD11c<sup>-</sup>/CD11b<sup>+</sup>/CD45<sup>hi</sup>,  $p = 0.001$  **f**, CD8<sup>+</sup> T cells, pre-gated on singlets/live/CD3<sup>+</sup>,  $p = 1.39 \times 10^{-4}$  **g**, Effector CD4<sup>+</sup> T cells, pre-gated on singlets/live/CD3<sup>+</sup>,  $p = 5.52 \times 10^{-4}$  **h**, Tregs, pre-gated on singlets/live/CD3<sup>+</sup>,  $p = 9.63 \times 10^{-4}$  **a-b**, A representative experiment is shown and statistics were performed using a two-tailed Student's T test. ( $n = 9$  mice) Data are presented as mean values  $\pm$  SEM. **c-h**, Paired averages compiled from 3-6 experiments. Statistics were performed using a randomized block ANOVA. ( $n = 49$  mice)

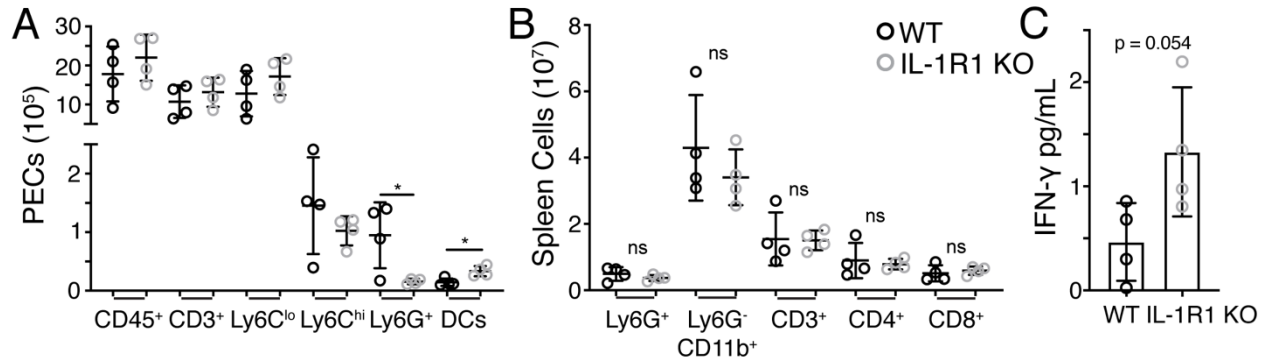

**Supplementary Figure 3 | IFN- $\gamma$  response and monocyte/macrophage response during acute infection are not impaired in IL-1R1 KO mice.** WT and IL-1R1 KO mice were infected i.p. with 10 cysts of the Me49 strain of *T. gondii*. Mice were sacrificed 12 days p.i. **a**, Peritoneal lavage was performed and peritoneal exudate cells (PECs) were isolated and analyzed by flow cytometry. For Ly6G<sup>+</sup> cells  $p = 0.03$ , for DCs  $p = 0.01$ . **b**, Spleen cells were isolated and analyzed by flow cytometry. **c**, Serum was harvested at the time of sacrifice and IFN- $\gamma$  in the serum was analyzed by ELISA. A representative experiment is shown ( $n = 4$  mice per group). Statistics were performed using a two-tailed Student's  $t$ -test between groups for each measure. Data are presented as mean values  $\pm$  SEM.

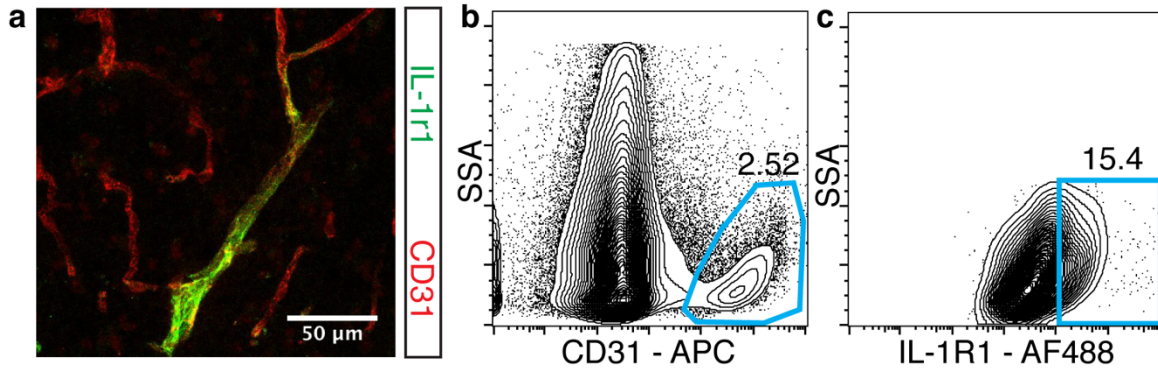

**Supplementary Figure 4 | IL-1R1 is expressed by endothelial cells in the brain.** **a**, Brains from chronically infected C57B6/J mice were harvested, fixed, and stained with antibodies against CD31 (red) and IL-1R1 (green). Representative of two independent experiments. **b-c**, Brains from uninfected C57B6/J mice were harvested and processed for flow cytometry analysis. Cells were previously gated on Singlets/Live/CD45<sup>-</sup> and then were gated on CD31<sup>+</sup> (**b**) and IL-1R1 (**c**) expression on the CD31<sup>+</sup> population.

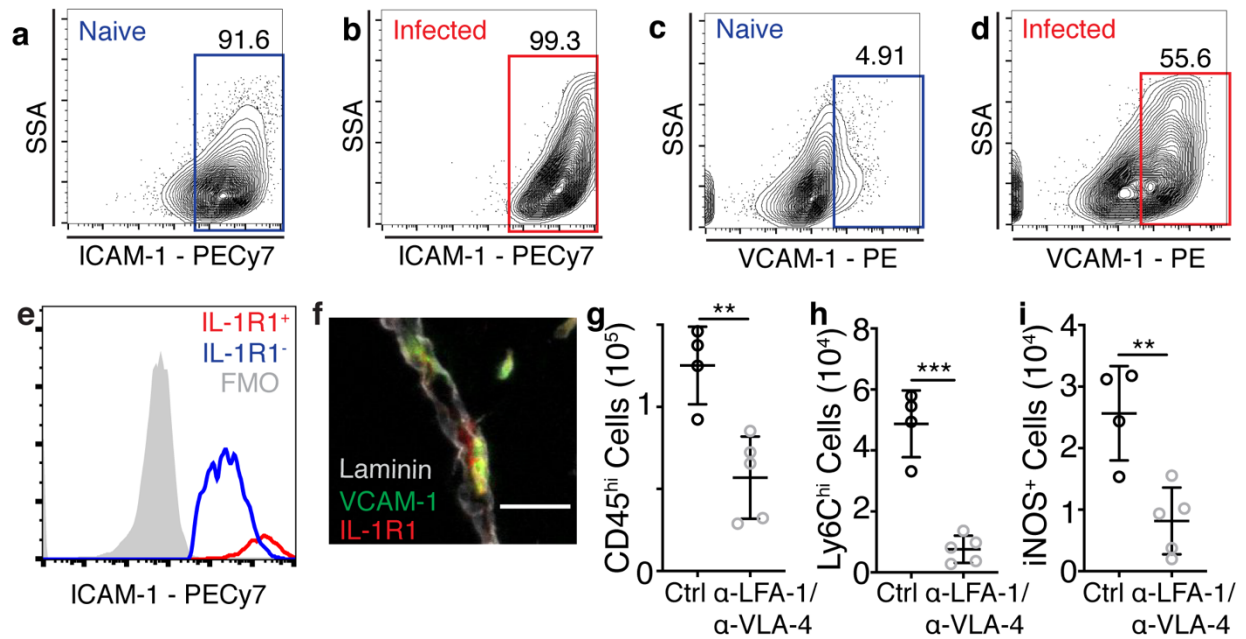

**Supplementary Figure 5 | The brain endothelium is activated during chronic *T. gondii* infection.**

**a-d**, WT C57B6/J mice were either left naïve or infected i.p. with the Me49 strain of *T. gondii*. 4 weeks p.i. mice were sacrificed and brains were harvested for flow cytometry analysis. (n = 2 mice per group) **a-b**, Samples were pre-gated on singlets/live/Hoescht<sup>+</sup>/CD45<sup>-</sup>/CD31<sup>+</sup> and then ICAM-1 expression was assessed. Representative plots from naïve (**a**) and infected (**b**) mice are shown. **c-d**, Samples were pre-gated as in **a** and then VCAM-1 expression was assessed. Representative plots from naïve (**c**) and infected (**d**) mice are shown. **e**, Histogram showing ICAM-1 expression on IL-1R1 positive and negative endothelial cells, the FMO is shown in filled gray **f**, Brains from chronically infected C57B6/J mice were harvested, fixed, and stained with antibodies against laminin (gray), IL-1R1 (red), and VCAM-1 (green). Scale bar = 50  $\mu$ m **g-i**, C57B6/J mice were infected i.p. with 10 cysts of the Me49 strain of *T. gondii*. 4 weeks p.i. mice were treated with either control IgG or 200  $\mu$ g each of  $\alpha$ -LFA-1 and  $\alpha$ -VLA-4 blocking antibodies on days 1 and 3 of treatment, and were sacrificed on day 5. Brains were harvested and processed for flow cytometry. (n = 9 mice) **g**, Cells were previously gated on singlets/live/CD11c<sup>-</sup>/CD45<sup>+</sup> and the numbers of CD11b<sup>+</sup>CD45<sup>hi</sup> cells are shown. p = 0.004. Of the CD45<sup>hi</sup> cells numbers of Ly6C<sup>hi</sup> cells, p = 0.0001 (**h**) and iNOS<sup>+</sup> cells, p = 0.005 (**i**) were enumerated. Statistics were performed using a two-tailed Student's T-test. Data are presented as mean values  $\pm$  SEM.

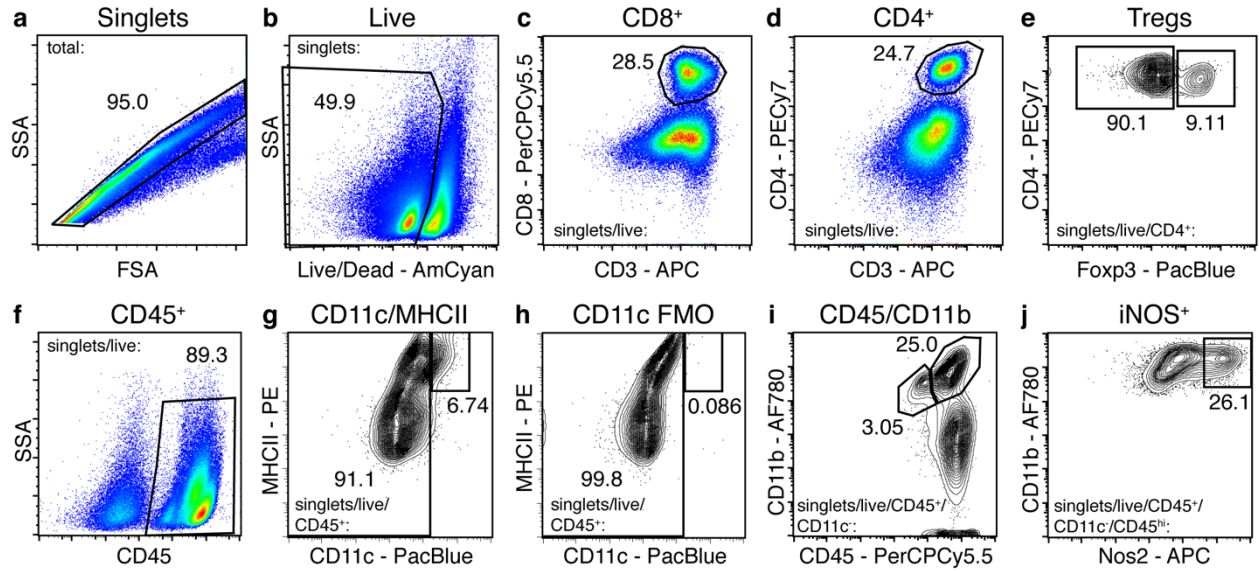

**Supplementary Figure 6 | Example gating strategy for brain immune populations.** Myeloid and T cell populations were identified using two separate panels. **a-b**, for all panels, samples were first gated on singlets and then cells which excluded the live/dead dye. **c-e**, to identify T cell populations, live cells were plotted to gate on either CD8+CD3+ (**c**) or CD4+CD3+ (**d**) cells. **e**, to identify Tregs, CD4+ T cells were gated on FcγR3+. **f-j**, to identify myeloid cell populations live cells were first gated on CD45+ (**f**). CD45+ cells were then gated on CD11c and MHCII (**g**), CD11c+MHCII hi cells were called DCs. CD11c- cells were then gated by CD45 and CD11b (**i**). CD11b+CD45int cells were called microglia, and CD11b+CD45hi cells were called infiltrating myeloid cells. CD45hi cells were then gated on iNOS+ (**j**).
